# Supplementary material for: Investigating the relationship between the mechanical properties of plasma polymer-like thin films and their glass transition temperature
Source: Royal Society of Chemistry journal article supplement (doi:10.1039/d1sm01134k), 2021-01-01
Supplement: d1sm01134k1.pdf [file d1sm01134k1.pdf]

## Supporting information

### Investigating the relationship between the mechanical properties of plasma polymer-like thin films and their glass transition temperature

*Nathan Vinx,<sup>1</sup> Pascal Damman,<sup>2</sup> Philippe Leclère,<sup>3</sup> Bruno Bresson,<sup>4</sup> Christian Fretigny,<sup>4</sup> Claude Poleunis,<sup>5</sup> Arnaud Delcorte,<sup>5</sup> Damien Cossement,<sup>6</sup> Rony Snyders<sup>1,6</sup>, and Damien Thiry<sup>1\*</sup>*

<sup>1</sup> Chimie des Interactions Plasma-Surface (ChIPS), CIRMAP, University of Mons, 20 Place du Parc, B-7000 Mons, Belgium

<sup>2</sup> Interface et Fluides Complexes (Influx), CIRMAP, University of Mons, 20 Place du Parc, B-7000 Mons, Belgium

<sup>3</sup> Laboratory for Chemistry of Novel Materials (CMN), CIRMAP, University of Mons, 20 Place du Parc, B-7000 Mons, Belgium

<sup>4</sup> Sciences et Ingénierie de la Matière Molle (SIMM), ESPCI, 10 rue Vauquelin, F-75231 Paris Cedex 05, France

<sup>5</sup> Institute of Condensed Matter and Nanosciences (IMCN), Université catholique de Louvain (UCL), Place Louis Pasteur 1, B-1348 Louvain-la-Neuve, Belgium

<sup>6</sup> Materia Nova Research Center, Parc Initialis, B-7000 Mons, Belgium

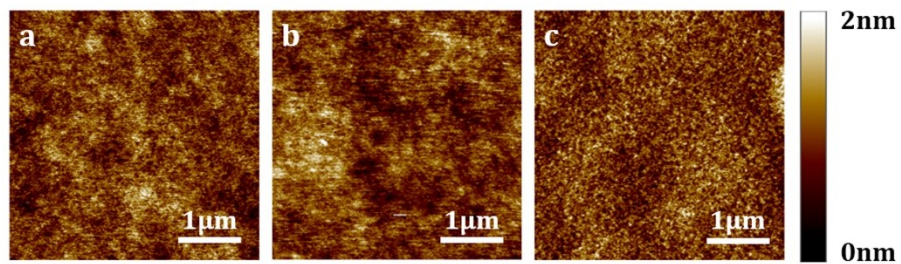

**Figure S1:** 2D AFM images of (a) PPF<sub>10°C</sub> (b) PPF<sub>23°C</sub> (c) PPF<sub>45°C</sub>.

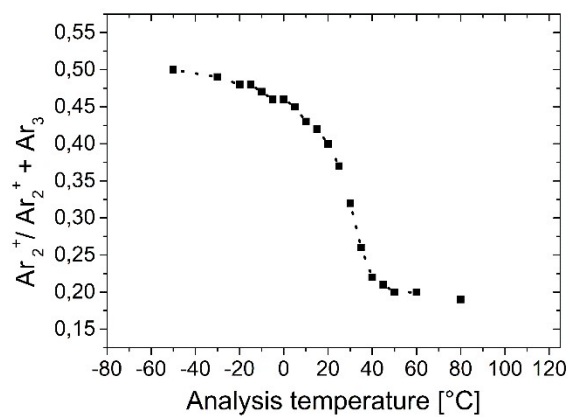

**Figure S2:**  $\text{Ar}_2^+ / (\text{Ar}_2^+ + \text{Ar}_3^+)$  ratio of backscattered ions collected during ToF-SIMS experiments versus the analysis temperature for  $\text{PPF}_{10^\circ\text{C}}$  annealed during 1h at  $150^\circ\text{C}$  in air. The analysis of the data reveals a surface transition temperature ( $T_T$ ) of  $32^\circ\text{C}$ .

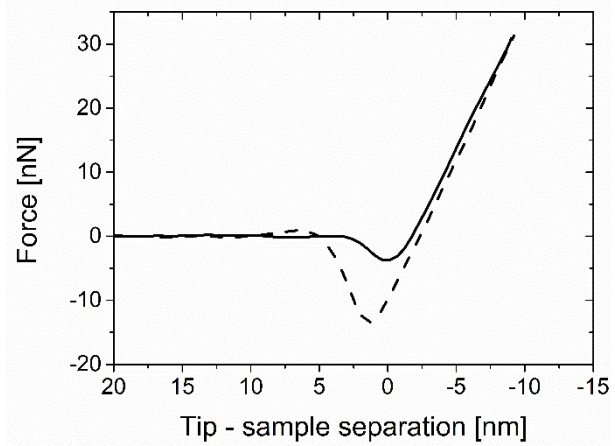

**Figure S3:** Typical force-distance curve recorded by AFM Peak Force measurements on PPF<sub>10°C</sub> annealed for 1h at 150°C in air.
